# Supplementary material for: Preservation and degradation of ancient organic matter in mid-Miocene Antarctic permafrost
Source: Copernicus journal article supplement (doi:10.5194/bg-22-5771-2025), 2025-10-21
Supplement: Supplementary file 1 [file Supplementary Figures.pdf › Supplementary Figures.pdf]

Supplementary Figures

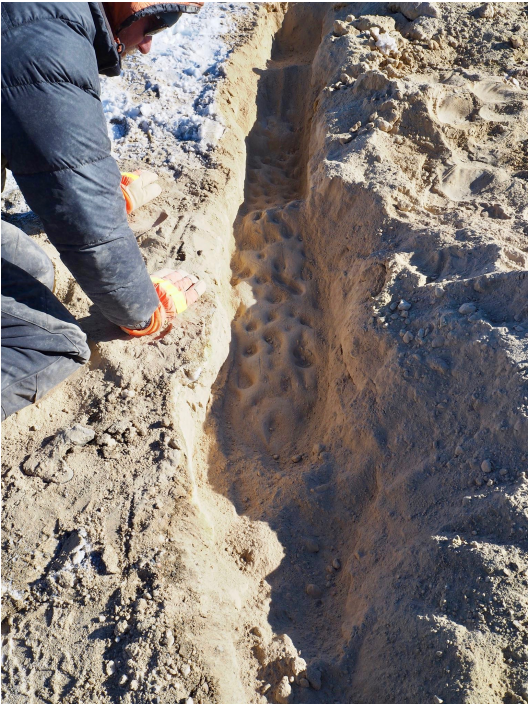

Figure S1: Uncovered ice table at Friis Hills, overlain by a 35 cm thick layer of dry permafrost (photo credit: H. Chorley)

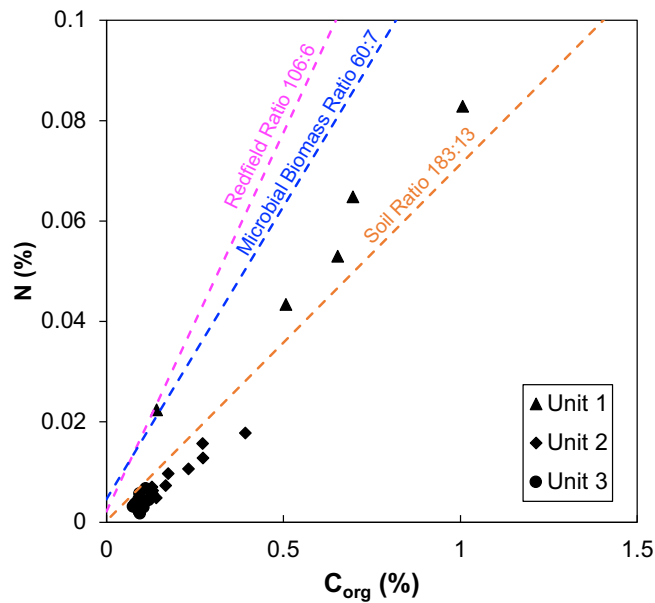

5 Figure S2: Scatterplots showing relations between  $C_{org}$  and N and the Redfield Ratio for algal biomass (Redfield, 1934), and the ratio for microbial biomass and soil (Cleveland and Liptzin, 2007).

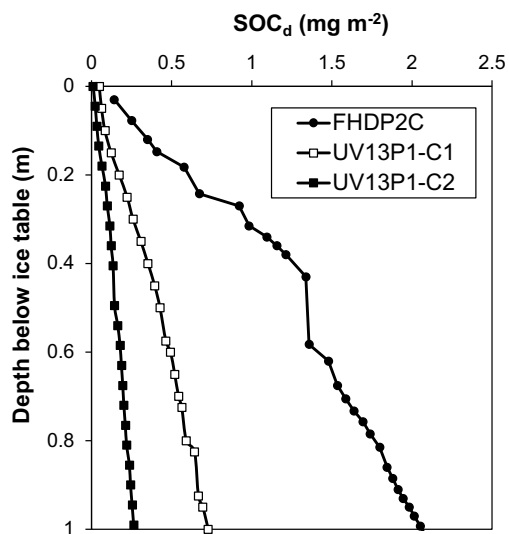

Figure S3: Cumulative soil organic carbon density (SOCd) with depth below the ice table for FHDP2C and two sites in University Valley (UV13P1-C1 and C2; Faucher et al., 2017) in the upper 50 cm of ice-cemented permafrost.

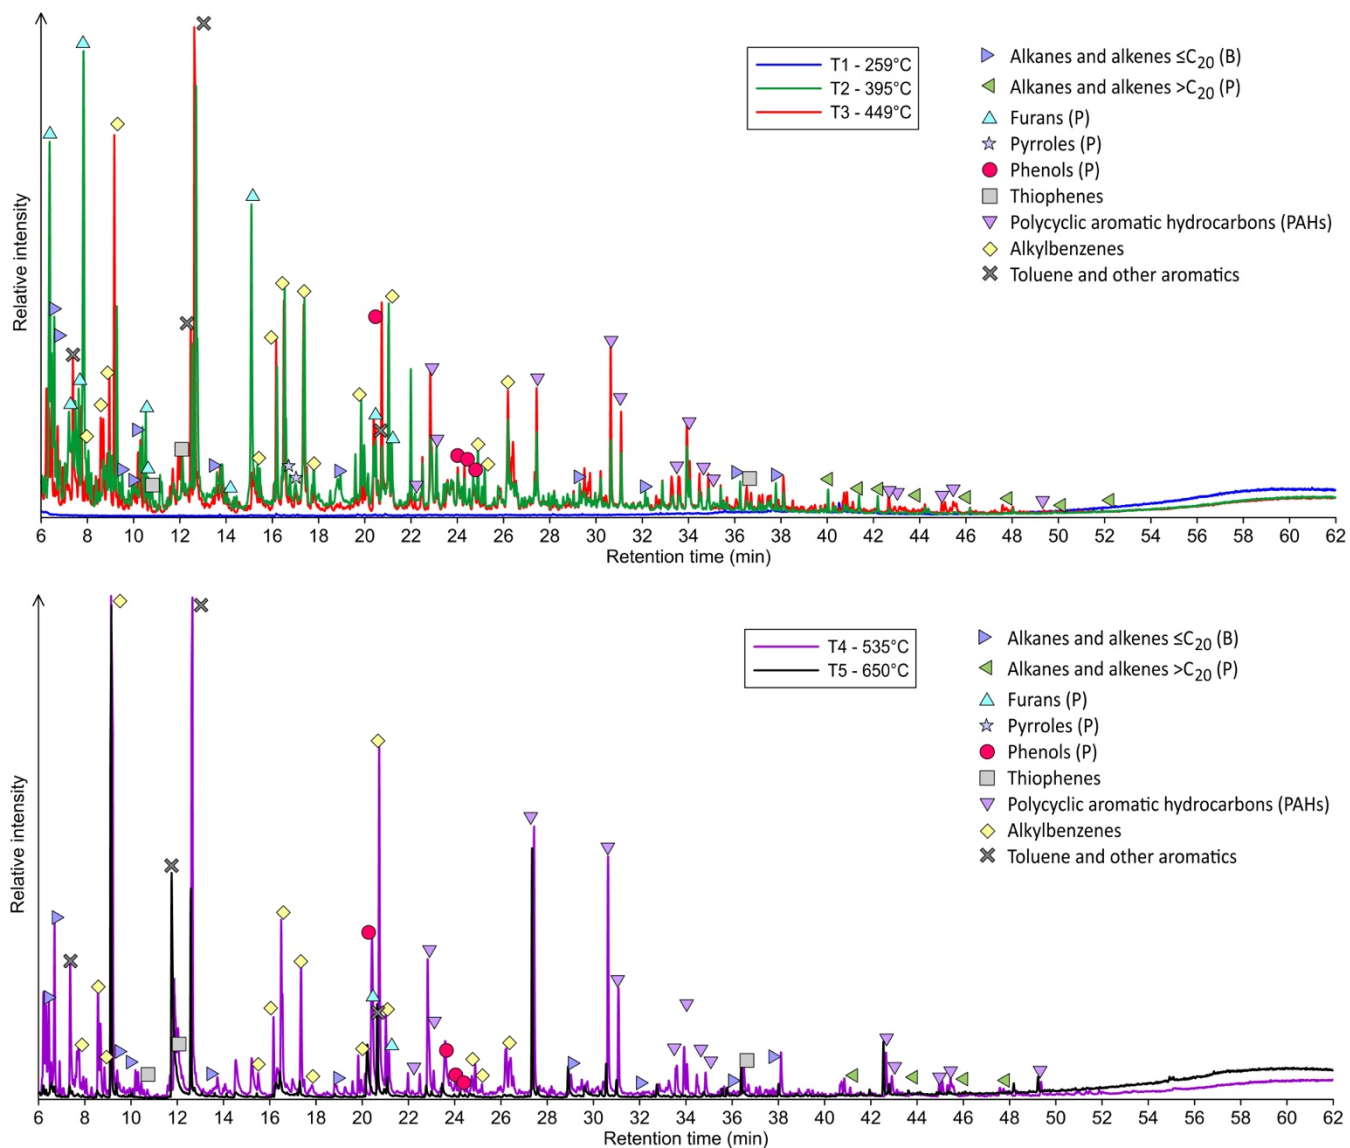

Figure S4: Py-GC-MS chromatograms for the different splits detailed in Table 1.
