# Supplementary material for: Preservation and degradation of ancient organic matter in mid-Miocene Antarctic permafrost
Source: Copernicus journal article supplement (doi:10.5194/bg-22-5771-2025), 2025-10-21
Supplement: Supplementary file 2 [file Supplementary_Data.pdf › Supplementary_Data.pdf]

| <b>SAMPLE ID</b> | <b>Depth (cm)</b> | <b>%Corg</b> | <b>%N</b> | <b>C:N</b> | <b>13C (permil VPDB)</b> |
|------------------|-------------------|--------------|-----------|------------|--------------------------|
| 2-C0-1           | 1                 | 0.141        | 0.022     | 6.3        | -22.1                    |
| 2-C0-2           | 5                 | 0.654        | 0.053     | 12.3       | -20.17                   |
| 2-C0-3           | 10                | 1.006        | 0.083     | 12.1       | -20.02                   |
| 2-C0-4           | 15                | 0.507        | 0.043     | 11.7       | -20.32                   |
| 2-C0-5           | 20                | 0.697        | 0.065     | 10.7       | -20.59                   |
| 2C-C1-2          | 38                | 0.174        | 0.010     | 17.9       | -22.03                   |
| 2C-C1-4          | 42.75             | 0.027        | 0.016     | 17.3       | -21.09                   |
| 2C-C1-7          | 49.75             | 0.231        | 0.011     | 21.7       | -19.84                   |
| 2C-C1-10         | 59.25             | 0.273        | 0.013     | 21.3       | -20.35                   |
| 2C-C1-11         | 62                | 0.121        | 0.005     | 24.5       | -20.91                   |
| 2C-C1-14         | 69                | 0.140        | 0.005     | 28.6       | -22.53                   |
| 2C-C1-15         | 71                | 0.131        | 0.006     | 20.6       | -22.9                    |
| 2C-C1-18         | 78                | 0.060        | 0.001     | 67.5       | -25.17                   |
| 2C-C1-21         | 93.25             | 0.119        | 0.004     | 26.8       | -22.84                   |
| 2C-C1-24         | 102.5             | 0.088        | 0.003     | 30.4       | -25.83                   |
| 2C-C1-25         | 105.5             | 0.081        | 0.004     | 22.2       | -26                      |
| 2C-C1-26         | 108.25            | 0.093        | 0.004     | 24.9       | -25.29                   |
| 2C-C1-28         | 113.5             | 0.090        | 0.004     | 20.0       | -25.44                   |
| 2C-C2-1          | 121               | 0.083        | 0.003     | 25.2       | -27                      |
| 2C-C2-3          | 126               | 0.111        | 0.007     | 16.4       | -25.52                   |
| 2C-C2-5          | 130               | 0.094        | 0.006     | 16.4       | -25.24                   |
| 2C-C2-7          | 134.25            | 0.104        | 0.003     | 34.9       | -25.43                   |
| 2C-C2-9          | 139.25            | 0.094        | 0.002     | 53.8       | -25.65                   |

| SAMPLE ID   | Depth (cm) | n-C12:0 FA (uξ n-C13 anteis) | n-C13:0 FA (uξ n-C14 iso- | n-C14 iso- | (uξ n-C14 anteis) | (uξ n-C14 anteis) |
|-------------|------------|------------------------------|---------------------------|------------|-------------------|-------------------|
| 2-C0-1 FA   | 1          | 0.05                         | 0.00                      | 8.94       | 0.26              | 0.18              |
| 2-C0-2 FA   | 5          | 17.32                        | 4.09                      | 16.17      | 6.30              | 3.57              |
| 2-C0-3 FA   | 10         | 8.50                         | 3.28                      | 10.03      | 4.63              | 2.50              |
| 2-C0-4 FA   | 15         | 34.88                        | 11.42                     | 35.24      | 18.52             | 11.93             |
| 2-C0-5 F2A  | 20         | 7.35                         | 2.95                      | 10.97      | 5.33              | 2.98              |
| 2C-C1-2 FA  | 38         | 101.34                       | 31.27                     | 100.82     | 29.04             | 17.89             |
| 2C-C1-4 FA  | 42.75      | 42.42                        | 9.49                      | 50.31      | 17.63             | 11.93             |
| 2C-C1-7 FA  | 49.75      | 95.46                        | 20.14                     | 61.76      | 109.21            | 11.45             |
| 2C-C1-10 FA | 59.25      | 63.56                        | 15.96                     | 79.14      | 33.45             | 17.38             |
| 2C-C1-11 FA | 62         | 3.94                         | 1.55                      | 11.97      | 7.01              | 2.61              |
| 2C-C1-14 FA | 69         | 67.59                        | 29.17                     | 103.69     | 41.37             | 22.91             |
| 2C-C1-18 FA | 78         | 3279.95                      | 599.62                    | 2196.27    | 743.51            | 546.64            |
| 2C-C1-21 FA | 93.25      | 120.87                       | 30.16                     | 71.09      | 64.07             | 33.81             |
| 2C-C1-24 FA | 102.5      | 57.55                        | 17.22                     | 67.40      | 36.20             | 18.69             |
| 2C-C1-25 FA | 105.5      | 0.00                         | 0.00                      | 20.83      | 10.87             | 0.00              |
| 2C-C1-26 FA | 108.25     | 90.56                        | 6.39                      | 78.50      | 4.40              | 42.60             |
| 2C-C1-28 FA | 113.5      | 15.44                        | 5.22                      | 38.71      | 16.18             | 8.55              |
| 2C-C2-1 FA  | 121        | 166.26                       | 22.88                     | 71.11      | 95.47             | 18.69             |
| 2C-C2-3 FA  | 126        | 138.88                       | 44.28                     | 125.65     | 150.02            | 36.78             |
| 2C-C2-5 FA  | 130        | 47.73                        | 19.66                     | 81.03      | 62.51             | 33.33             |
| 2C-C2-7 FA  | 134.25     | 54.68                        | 12.40                     | 53.68      | 18.46             | 35.21             |
| 2C-C2-9 FA  | 139.25     | 148.63                       | 25.18                     | 67.26      | 24.03             | 17.16             |

| n-C14:0 FA (ug) | n-C15 iso- (ug | n-C15 anteiso (ug | n-C15:0 FA (ug | n-C16 iso- (ug | n-C16:0 FA (ug | n-C17 iso- (ug |
|-----------------|----------------|-------------------|----------------|----------------|----------------|----------------|
| 69.83           | 8.46           | 18.78             | 110.97         | 6.77           | 1145.89        | 5.76           |
| 30.26           | 7.52           | 9.41              | 21.20          | 2.56           | 104.17         | 3.63           |
| 22.78           | 7.12           | 7.94              | 16.10          | 2.76           | 85.63          | 3.11           |
| 64.53           | 18.84          | 21.92             | 46.39          | 4.27           | 217.62         | 7.19           |
| 25.25           | 8.65           | 9.41              | 19.99          | 3.03           | 83.82          | 4.08           |
| 295.07          | 44.00          | 52.33             | 121.64         | 16.56          | 10464.11       | 21.59          |
| 202.11          | 32.61          | 34.19             | 85.61          | 13.46          | 4937.60        | 10.75          |
| 226.12          | 25.64          | 32.97             | 73.69          | 6.10           | 4912.95        | 6.87           |
| 426.40          | 51.21          | 85.85             | 180.44         | 16.48          | 15231.70       | 12.73          |
| 144.41          | 18.35          | 27.88             | 85.04          | 7.26           | 8032.81        | 9.54           |
| 852.35          | 70.16          | 67.45             | 279.42         | 19.86          | 18980.59       | 0.00           |
| 22677.35        | 1300.82        | 2118.83           | 9519.01        | 731.79         | 793805.65      | 0.00           |
| 331.36          | 33.54          | 44.23             | 124.16         | 15.12          | 8056.28        | 12.26          |
| 544.45          | 64.82          | 119.07            | 247.21         | 18.16          | 22221.20       | 21.95          |
| 253.61          | 37.25          | 70.55             | 172.70         | 26.03          | 12609.01       | 15.04          |
| 1018.09         | 63.08          | 76.33             | 354.88         | 0.00           | 29472.65       | 18.31          |
| 546.11          | 44.31          | 65.57             | 215.08         | 13.36          | 28295.38       | 14.16          |
| 692.33          | 58.76          | 68.01             | 242.50         | 29.28          | 33672.47       | 26.18          |
| 1052.64         | 82.81          | 117.66            | 360.99         | 27.78          | 45155.89       | 35.72          |
| 753.78          | 64.52          | 92.42             | 254.63         | 15.23          | 27330.57       | 28.94          |
| 569.00          | 41.99          | 46.11             | 218.82         | 7.67           | 26808.59       | 48.60          |
| 585.62          | 54.49          | 77.22             | 183.64         | 28.94          | 22662.58       | 29.94          |

| n-C17 anteis | n-C17:0 FA (u | n-C18:1(9) FA (i | n-C18:0 FA (u | g- n-C20:1(11) F | n-C20:1 FA (i | n-C20:0 FA (u |
|--------------|---------------|------------------|---------------|------------------|---------------|---------------|
| 15.73        | 290.78        | 139.77           | 1669.86       | 8.65             | 0.05          | 129.95        |
| 3.00         | 24.00         | 0.69             | 99.88         | 1.23             | 1.29          | 41.13         |
| 2.64         | 16.51         | 1.39             | 70.99         | 66.25            | 39.48         | 1248.68       |
| 5.70         | 46.97         | 0.00             | 186.20        | 0.00             | 0.00          | 45.43         |
| 2.83         | 21.55         | 1.07             | 69.12         | 0.00             | 0.00          | 30.38         |
| 17.93        | 113.73        | 45.18            | 5130.77       | 0.00             | 0.00          | 133.44        |
| 11.01        | 73.24         | 56.75            | 3045.15       | 6.87             | 3.55          | 90.26         |
| 4.78         | 68.99         | 46.77            | 3605.73       | 0.00             | 15.32         | 181.63        |
| 17.39        | 149.21        | 201.27           | 6777.94       | 37.65            | 23.62         | 148.71        |
| 12.43        | 118.49        | 175.23           | 6929.97       | 16.07            | 6.05          | 223.78        |
| 75.59        | 169.16        | 108.63           | 8501.79       | 0.00             | 0.00          | 226.32        |
| 0.00         | 9565.88       | 10355.36         | 287386.28     | 2234.39          | 0.00          | 7014.79       |
| 12.34        | 114.77        | 79.43            | 4638.65       | 10.41            | 20.74         | 110.06        |
| 17.02        | 257.76        | 268.42           | 14691.21      | 132.40           | 0.00          | 343.12        |
| 12.04        | 274.41        | 301.61           | 9959.75       | 16.35            | 0.00          | 469.68        |
| 22.75        | 277.77        | 439.71           | 12959.20      | 17.54            | 27.98         | 290.43        |
| 20.32        | 226.95        | 360.47           | 14052.97      | 127.90           | 0.00          | 279.49        |
| 25.73        | 267.49        | 140.18           | 15201.01      | 78.33            | 0.00          | 293.55        |
| 30.04        | 350.84        | 227.78           | 14702.32      | 30.44            | 94.61         | 281.57        |
| 20.54        | 250.16        | 155.19           | 10118.73      | 60.07            | 103.05        | 237.22        |
| 400.54       | 342.95        | 389.96           | 11133.56      | 75.70            | 34.04         | 517.16        |
| 25.70        | 198.89        | 233.38           | 11446.81      | 26.85            | 48.07         | 295.35        |

| n-C21:0 FA (u) | n-C22:1(13)FA | n-C22:0 FA (u) | n-C23:0 FA (u) | n-C24:0 FA (u) | n-C25:0 FA (u) | n-C26:0 FA (u) |
|----------------|---------------|----------------|----------------|----------------|----------------|----------------|
| 77.71          | 0.00          | 169.08         | 115.60         | 186.38         | 39.40          | 87.25          |
| 25.57          | 1.99          | 47.37          | 27.08          | 65.09          | 8.91           | 30.50          |
| 671.37         | 185.10        | 965.82         | 426.08         | 812.82         | 90.88          | 270.18         |
| 28.53          | 2.32          | 42.71          | 21.93          | 42.38          | 7.23           | 20.46          |
| 17.09          | 1.13          | 28.63          | 17.52          | 41.20          | 5.22           | 15.92          |
| 105.42         | 0.00          | 163.57         | 171.18         | 231.47         | 31.64          | 63.70          |
| 37.29          | 0.00          | 51.33          | 41.17          | 42.92          | 6.21           | 0.00           |
| 58.77          | 34.23         | 106.83         | 100.41         | 152.70         | 0.00           | 57.60          |
| 67.73          | 41.16         | 111.40         | 49.93          | 92.59          | 28.92          | 54.33          |
| 124.60         | 28.80         | 205.20         | 127.14         | 208.06         | 44.19          | 79.77          |
| 60.55          | 28.32         | 107.64         | 47.59          | 67.08          | 25.05          | 42.94          |
| 3637.49        | 6578.44       | 5830.43        | 1701.74        | 4163.70        | 1582.10        | 3482.58        |
| 60.88          | 44.23         | 153.19         | 59.54          | 121.21         | 36.66          | 67.05          |
| 136.39         | 258.59        | 266.73         | 118.72         | 265.85         | 103.57         | 201.85         |
| 199.03         | 121.42        | 292.77         | 113.14         | 257.16         | 94.21          | 138.63         |
| 68.96          | 182.51        | 217.00         | 58.29          | 173.71         | 68.35          | 110.54         |
| 122.53         | 189.05        | 249.03         | 103.46         | 252.16         | 92.68          | 188.26         |
| 154.17         | 237.42        | 298.29         | 116.90         | 264.41         | 97.45          | 194.03         |
| 136.10         | 167.34        | 275.43         | 114.39         | 226.22         | 80.43          | 152.96         |
| 121.16         | 255.23        | 249.92         | 103.24         | 209.99         | 82.27          | 152.92         |
| 155.07         | 347.26        | 360.53         | 98.36          | 225.52         | 90.89          | 184.97         |
| 128.16         | 222.73        | 240.66         | 91.42          | 230.39         | 78.54          | 179.74         |

| n-C27:0 FA (μg/g) | n-C28:0 FA (μg/g) | n-C30:0 FA (μg/g) | hopanoic acid | hopanoic acid | hopanoic acid | sum even C17 |
|-------------------|-------------------|-------------------|---------------|---------------|---------------|--------------|
| 13.02             | 28.71             | 4.94              | 0.00          | 3.85          | 0.00          | 2.89         |
| 3.29              | 8.59              | 1.37              | 0.00          | 2.47          | 4.09          | 0.23         |
| 33.67             | 45.48             | 0.00              | 0.00          | 29.35         | 64.51         | 0.18         |
| 2.67              | 8.64              | 2.28              | 0.00          | 2.88          | 0.00          | 0.47         |
| 1.89              | 3.20              | 0.00              | 0.00          | 1.27          | 2.05          | 0.18         |
| 14.46             | 17.59             | 0.00              | 0.00          | 0.00          | 0.00          | 15.89        |
| 0.00              | 0.00              | 0.00              | 0.00          | 0.00          | 0.00          | 8.18         |
| 8.36              | 17.34             | 3.17              | 0.00          | 0.00          | 0.00          | 8.74         |
| 12.43             | 24.57             | 0.00              | 0.00          | 0.00          | 0.00          | 22.44        |
| 11.46             | 23.43             | 0.00              | 0.00          | 0.00          | 0.00          | 15.11        |
| 0.00              | 0.00              | 0.00              | 0.00          | 0.00          | 0.00          | 28.33        |
| 860.85            | 1648.47           | 0.00              | 0.00          | 0.00          | 0.00          | 1103.87      |
| 17.34             | 24.68             | 4.28              | 0.00          | 7.38          | 0.00          | 13.03        |
| 50.28             | 83.95             | 17.92             | 0.00          | 20.25         | 0.00          | 37.46        |
| 38.67             | 76.03             | 0.00              | 0.00          | 0.00          | 0.00          | 22.82        |
| 38.69             | 51.71             | 0.00              | 0.00          | 0.00          | 0.00          | 43.45        |
| 33.04             | 67.50             | 0.00              | 0.00          | 13.74         | 0.00          | 42.89        |
| 40.32             | 74.10             | 13.14             | 9.17          | 16.13         | 0.00          | 49.57        |
| 44.28             | 70.78             | 30.88             | 0.00          | 29.35         | 0.00          | 60.91        |
| 29.28             | 57.98             | 0.00              | 0.00          | 0.00          | 0.00          | 38.20        |
| 41.75             | 88.42             | 24.21             | 0.00          | 25.64         | 0.00          | 38.51        |
| 35.97             | 85.87             | 13.39             | 0.00          | 20.87         | 0.00          | 34.70        |

| sum even C2 | sum even C2 | CPI 22-28 | 100Sum iso- | ACL 22-30 | Cmax | HPFA |
|-------------|-------------|-----------|-------------|-----------|------|------|
| 0.49        | 0.12        | 2.2       | 3.59        | 23.9      | 18   | 0.79 |
| 0.15        | 0.04        | 3.1       | 17.49       | 24.0      | 16   | 0.54 |
| 3.03        | 0.32        | 2.9       | 19.93       | 23.5      | 20   | 0.96 |
| 0.13        | 0.03        | 2.8       | 18.62       | 24.0      | 16   | 0.46 |
| 0.10        | 0.02        | 3.0       | 22.33       | 23.8      | 16   | 0.44 |
| 0.53        | 0.08        | 1.8       | 1.42        | 23.7      | 16   | 0.54 |
| 0.18        | 0.00        | 1.4       | 2.00        | 23.0      | 16   | 0.34 |
| 0.44        | 0.08        | 2.5       | 1.51        | 23.8      | 16   | 0.72 |
| 0.35        | 0.08        | 2.4       | 1.18        | 24.0      | 16   | 0.56 |
| 0.64        | 0.10        | 2.2       | 0.92        | 23.7      | 16   | 0.55 |
| 0.40        | 0.04        | 2.3       | 1.20        | 23.5      | 16   | 0.37 |
| 17.01       | 5.13        | 2.7       | 0.51        | 24.2      | 16   | 0.98 |
| 0.38        | 0.10        | 2.4       | 1.42        | 24.0      | 16   | 0.31 |
| 0.88        | 0.30        | 2.4       | 1.06        | 24.4      | 16   | 0.80 |
| 1.02        | 0.21        | 2.4       | 1.23        | 24.1      | 16   | 0.59 |
| 0.68        | 0.16        | 2.5       | 0.60        | 24.2      | 16   | 0.47 |
| 0.78        | 0.26        | 2.6       | 0.55        | 24.2      | 16   | 0.57 |
| 0.86        | 0.28        | 2.5       | 0.61        | 24.2      | 16   | 0.59 |
| 0.78        | 0.25        | 2.3       | 0.64        | 24.3      | 16   | 0.55 |
| 0.70        | 0.21        | 2.4       | 0.80        | 24.1      | 16   | 0.55 |
| 1.10        | 0.30        | 2.7       | 1.99        | 24.2      | 16   | 0.58 |
| 0.77        | 0.28        | 2.8       | 0.94        | 24.4      | 16   | 0.68 |

**sum Hopanoic Acids (ug g<sup>-1</sup> TOC)**

3.8461765

6.56064676

93.861458

2.87729293

3.31972063

0

0

0

0

0

0

0

7.37552711

20.2541826

0

0

13.7399956

25.2940915

29.3539096

0

25.6367027

20.8658701



| <b>SAMPLE ID</b> | <b>Depth (cm)</b> | <b>C15 n-alkane</b> | <b>C16 n-alkane</b> | <b>C17 n-alkane</b> | <b>Pristane (ug/g)</b> | <b>C18 n-alkane (ug/g)</b> |
|------------------|-------------------|---------------------|---------------------|---------------------|------------------------|----------------------------|
| 2-C0-1 F1        | 1                 | 87.28               | 406.73              | 654.90              | 82.78                  | 1236.44                    |
| 2-C0-2 F1        | 5                 | 3.00                | 13.48               | 68.39               | 11.57                  | 71.79                      |
| 2-C0-3 F1        | 10                | 10.58               | 33.90               | 102.30              | 10.37                  | 101.94                     |
| 2-C0-4 F1        | 15                | 2.34                | 55.64               | 137.13              | 21.17                  | 347.93                     |
| 2-C0-5 F1        | 20                | 44.73               | 157.41              | 256.90              | 36.44                  | 454.32                     |
| 2C-C1-2 F1       | 38                | 0.15                | 0.31                | 1.43                | 0.32                   | 25.39                      |
| 2C-C1-4 F1       | 42.75             | 14.04               | 0.00                | 152.63              | 1.81                   | 250.42                     |
| 2C-C1-7 F1       | 49.75             | 14.71               | 12.58               | 133.20              | 0.00                   | 26.85                      |
| 2C-C1-10 F1      | 59.25             | 0.76                | 33.47               | 80.40               | 18.23                  | 16.57                      |
| 2C-C1-11 F1      | 62                | 75.87               | 665.35              | 502.62              | 235.35                 | 565.55                     |
| 2C-C1-14 F1      | 69                | 10.29               | 79.84               | 196.09              | 56.44                  | 218.98                     |
| 2C-C1-15 F1      | 71                | 7.59                | 101.84              | 216.85              | 75.45                  | 370.60                     |
| 2C-C1-18 F1      | 78                | 0.74                | 33.02               | 410.50              | 69.51                  | 532.78                     |
| 2C-C1-21 F1      | 93.25             | 5.37                | 67.97               | 175.28              | 32.03                  | 169.45                     |
| 2C-C1-24 F1      | 102.5             | 2.88                | 78.80               | 127.76              | 27.78                  | 322.47                     |
| 2C-C1-25 F1      | 105.5             | 104.48              | 833.75              | 782.23              | 131.57                 | 612.54                     |
| 2C-C1-26 F1      | 108.25            | 17.37               | 258.05              | 582.75              | 83.77                  | 354.52                     |
| 2C-C1-28 F1      | 113.5             | 8.80                | 115.25              | 296.84              | 53.55                  | 325.93                     |
| 2C-C2-1 F1       | 121               | 3.63                | 118.19              | 334.93              | 45.29                  | 595.48                     |
| 2C-C2-3 F1       | 126               | 1.40                | 50.04               | 231.87              | 39.68                  | 433.36                     |
| 2C-C2-5 F1       | 130               | 1.77                | 46.34               | 330.26              | 48.75                  | 425.83                     |
| 2C-C2-7 F1       | 134.25            | 0.26                | 6.75                | 189.02              | 32.16                  | 346.91                     |
| 2C-C2-9 F1       | 139.25            | 0.49                | 3.60                | 74.56               | 24.81                  | 136.66                     |

| Phytane (ug) | C19 n-alkane | C20 n-alkane | C21 n-alkane | C22 n-alkane | C23 n-alkane | C24 n-alkane |
|--------------|--------------|--------------|--------------|--------------|--------------|--------------|
| 11.83        | 163.82       | 782.60       | 89.74        | 236.97       | 19.61        | 60.54        |
| 2.17         | 32.89        | 59.62        | 18.11        | 24.22        | 16.59        | 10.62        |
| 1.49         | 30.98        | 74.69        | 15.55        | 27.05        | 14.16        | 9.00         |
| 5.11         | 69.31        | 267.43       | 38.12        | 95.24        | 24.61        | 29.23        |
| 4.87         | 67.11        | 335.48       | 31.26        | 88.80        | 26.78        | 20.11        |
| 1.22         | 16.59        | 40.64        | 25.77        | 40.75        | 39.56        | 55.74        |
| 10.35        | 31.10        | 102.64       | 21.07        | 177.89       | 33.95        | 23.12        |
| 0.00         | 299.17       | 251.02       | 172.80       | 28.80        | 71.49        | 230.59       |
| 16.05        | 21.86        | 126.71       | 40.38        | 84.54        | 43.44        | 28.62        |
| 128.43       | 45.15        | 247.02       | 82.73        | 167.03       | 76.51        | 60.41        |
| 39.86        | 170.87       | 195.82       | 127.30       | 176.20       | 51.55        | 58.23        |
| 35.84        | 167.99       | 313.36       | 127.63       | 177.37       | 50.74        | 52.37        |
| 50.43        | 214.41       | 616.55       | 350.17       | 442.75       | 116.03       | 130.77       |
| 45.05        | 53.19        | 146.58       | 92.08        | 114.21       | 29.49        | 32.18        |
| 60.88        | 77.54        | 320.58       | 171.04       | 276.62       | 59.32        | 99.24        |
| 137.12       | 116.69       | 320.64       | 204.51       | 220.42       | 85.09        | 97.85        |
| 98.50        | 1635.48      | 546.97       | 0.00         | 1066.17      | 447.20       | 110.97       |
| 63.58        | 121.32       | 364.04       | 226.67       | 258.70       | 175.57       | 107.27       |
| 73.62        | 352.72       | 504.70       | 230.22       | 355.21       | 82.18        | 100.86       |
| 96.97        | 131.12       | 437.40       | 234.71       | 351.16       | 85.42        | 101.67       |
| 84.09        | 320.00       | 441.81       | 223.38       | 332.11       | 85.04        | 92.66        |
| 30.16        | 185.98       | 440.01       | 249.88       | 298.05       | 62.15        | 73.09        |
| 133.02       | 1537.82      | 82.67        | 409.23       | 919.77       | 0.00         | 79.95        |

| <b>C25 n-alkane</b> | <b>C26 n-alkane</b> | <b>C27 n-alkane</b> | <b>C28 n-alkane</b> | <b>C29 n-alkane</b> | <b>C30 n-alkane</b> | <b>Hopane (ug g</b> |
|---------------------|---------------------|---------------------|---------------------|---------------------|---------------------|---------------------|
| 528.94              | 22.77               | 44.15               | 10.50               | 20.04               | 12.38               | 0.00                |
| 39.54               | 7.00                | 38.64               | 5.32                | 30.11               | 3.57                | 11.78               |
| 30.45               | 4.87                | 22.77               | 3.03                | 16.36               | 2.01                | 8.82                |
| 72.54               | 12.92               | 41.78               | 7.07                | 25.60               | 5.14                | 8.70                |
| 40.32               | 8.65                | 37.53               | 4.90                | 23.32               | 2.88                | 11.45               |
| 40.25               | 105.05              | 124.52              | 86.42               | 83.01               | 58.51               | 12.73               |
| 30.17               | 23.03               | 44.74               | 16.50               | 25.84               | 10.89               | 9.95                |
| 168.80              | 80.02               | 34.40               | 72.09               | 25.24               | 119.09              | 0.00                |
| 39.64               | 20.02               | 81.37               | 12.69               | 32.94               | 7.34                | 0.00                |
| 225.73              | 49.33               | 152.81              | 36.25               | 66.57               | 23.78               | 0.00                |
| 592.21              | 41.19               | 120.17              | 38.72               | 41.85               | 24.99               | 0.00                |
| 372.13              | 38.11               | 112.94              | 23.07               | 43.63               | 21.67               | 0.00                |
| 857.62              | 82.60               | 295.74              | 56.52               | 116.73              | 45.31               | 0.00                |
| 361.52              | 26.81               | 87.19               | 33.63               | 30.07               | 20.36               | 0.00                |
| 1298.60             | 72.87               | 210.00              | 70.69               | 72.50               | 66.81               | 0.00                |
| 1217.43             | 85.53               | 239.38              | 86.81               | 89.78               | 89.00               | 0.00                |
| 1259.66             | 81.90               | 262.03              | 55.94               | 73.55               | 38.09               | 0.00                |
| 1333.22             | 77.51               | 246.31              | 57.64               | 80.64               | 47.74               | 0.00                |
| 1219.94             | 75.00               | 246.02              | 49.82               | 80.22               | 37.29               | 0.00                |
| 727.68              | 66.41               | 228.21              | 42.16               | 78.60               | 30.37               | 0.00                |
| 846.87              | 63.16               | 245.50              | 44.95               | 82.18               | 29.74               | 0.00                |
| 518.86              | 38.28               | 154.20              | 28.72               | 52.72               | 18.56               | 0.00                |
| 817.80              | 53.38               | 211.75              | 21.30               | 59.85               | 16.67               | 0.00                |

| C31 n-alkane | C32 n-alkane | Hopane (ug g | C33 n-alkane | Hopane (ug g | Hopane (ug g | C34 n-alkane |
|--------------|--------------|--------------|--------------|--------------|--------------|--------------|
| 13.85        | 4.08         | 0.00         | 5.48         | 0.00         | 0.00         | 13.91        |
| 21.73        | 2.65         | 9.27         | 5.25         | 3.92         | 2.18         | 2.65         |
| 12.39        | 2.16         | 7.20         | 2.91         | 2.91         | 3.49         | 3.14         |
| 16.79        | 7.69         | 6.01         | 4.79         | 3.57         | 4.08         | 3.40         |
| 15.77        | 3.10         | 8.63         | 3.74         | 3.00         | 3.34         | 4.87         |
| 54.88        | 31.38        | 8.78         | 24.79        | 7.61         | 11.72        | 3.84         |
| 13.31        | 6.16         | 6.72         | 3.28         | 3.38         | 4.69         | 3.30         |
| 29.21        | 240.94       | 0.00         | 59.23        | 0.00         | 0.00         | 0.00         |
| 18.70        | 8.67         | 0.00         | 5.17         | 0.00         | 0.00         | 0.00         |
| 36.49        | 3.89         | 0.00         | 12.09        | 0.00         | 0.00         | 16.12        |
| 24.11        | 20.34        | 0.00         | 7.82         | 0.00         | 0.00         | 11.10        |
| 24.11        | 15.49        | 0.00         | 9.28         | 0.00         | 0.00         | 8.87         |
| 60.80        | 32.88        | 0.00         | 24.19        | 0.00         | 0.00         | 0.00         |
| 18.05        | 0.00         | 0.00         | 5.90         | 0.00         | 0.00         | 8.23         |
| 41.46        | 26.27        | 0.00         | 15.16        | 0.00         | 0.00         | 16.24        |
| 55.18        | 46.07        | 0.00         | 25.94        | 0.00         | 0.00         | 42.23        |
| 40.82        | 18.18        | 0.00         | 10.22        | 0.00         | 0.00         | 12.94        |
| 44.90        | 21.39        | 0.00         | 11.99        | 0.00         | 0.00         | 14.00        |
| 42.74        | 24.64        | 0.00         | 13.15        | 0.00         | 0.00         | 16.27        |
| 37.96        | 20.78        | 0.00         | 8.52         | 0.00         | 0.00         | 10.46        |
| 38.32        | 25.81        | 0.00         | 11.56        | 0.00         | 0.00         | 14.37        |
| 22.23        | 20.38        | 0.00         | 8.04         | 0.00         | 0.00         | 10.29        |
| 27.52        | 0.00         | 0.00         | 0.00         | 0.00         | 0.00         | 0.00         |

| Hopane (ug g | sum odd C15 | sum odd C21 | sum odd C27 | CPI 25-33 | SC:LC | ACL 27-33 |
|--------------|-------------|-------------|-------------|-----------|-------|-----------|
| 0.00         | 906.00      | 638.29      | 83.52       | 6.94      | 4.93  | 28.8      |
| 4.58         | 104.27      | 74.24       | 95.72       | 6.08      | 1.61  | 28.9      |
| 3.62         | 143.87      | 60.17       | 54.43       | 5.65      | 3.31  | 28.9      |
| 3.49         | 208.79      | 135.27      | 88.96       | 3.74      | 4.08  | 28.9      |
| 4.07         | 368.74      | 98.36       | 80.36       | 5.05      | 7.67  | 28.8      |
| 5.85         | 18.17       | 105.57      | 287.19      | 1.05      | 0.21  | 29.1      |
| 3.11         | 197.77      | 85.19       | 87.17       | 1.78      | 3.25  | 28.7      |
| 0.00         | 447.09      | 413.09      | 148.07      | 0.40      | 0.83  | 30.7      |
| 0.00         | 103.02      | 123.47      | 138.18      | 3.19      | 1.36  | 28.5      |
| 0.00         | 623.65      | 384.97      | 267.97      | 3.31      | 3.16  | 28.4      |
| 0.00         | 377.25      | 771.05      | 193.95      | 3.88      | 1.15  | 28.6      |
| 0.00         | 392.43      | 550.50      | 189.95      | 3.78      | 1.94  | 28.6      |
| 0.00         | 625.65      | 1323.82     | 497.45      | 4.21      | 1.43  | 28.5      |
| 0.00         | 233.84      | 483.09      | 141.20      | 3.95      | 1.28  | 28.3      |
| 0.00         | 208.18      | 1528.96     | 339.11      | 4.14      | 0.68  | 28.6      |
| 0.00         | 1003.40     | 1507.03     | 410.28      | 3.27      | 1.51  | 28.8      |
| 0.00         | 2235.60     | 1706.86     | 386.62      | 5.21      | 1.86  | 28.3      |
| 0.00         | 426.96      | 1735.46     | 383.84      | 5.11      | 0.78  | 28.4      |
| 0.00         | 691.28      | 1532.34     | 382.14      | 5.28      | 1.27  | 28.4      |
| 0.00         | 364.40      | 1047.81     | 353.28      | 4.46      | 1.31  | 28.3      |
| 0.00         | 652.03      | 1155.29     | 377.56      | 4.86      | 1.35  | 28.4      |
| 0.00         | 375.26      | 830.89      | 237.18      | 4.65      | 1.72  | 28.4      |
| 0.00         | 1612.87     | 1227.03     | 299.12      | 7.75      | 2.46  | 27.9      |

| Cmax | Paq index | Sum Hopane:Pristane:Phytane |      |
|------|-----------|-----------------------------|------|
| 18   | 0.94      | 0                           | 7.00 |
| 18   | 0.52      | 31.72                       | 5.33 |
| 17   | 0.61      | 26.04                       | 6.95 |
| 18   | 0.70      | 25.85                       | 4.15 |
| 18   | 0.63      | 30.50                       | 7.48 |
| 27   | 0.37      | 46.69                       | 0.26 |
| 18   | 0.62      | 27.86                       | 0.17 |
| 19   | 0.82      | 0                           |      |
| 20   | 0.62      | 0                           | 1.14 |
| 16   | 0.75      | 0                           | 1.83 |
| 25   | 0.91      | 0                           | 1.42 |
| 25   | 0.86      | 0                           | 2.11 |
| 25   | 0.85      | 0                           | 1.38 |
| 25   | 0.89      | 0                           | 0.71 |
| 25   | 0.92      | 0                           | 0.46 |
| 25   | 0.90      | 0                           | 0.96 |
| 19   | 0.94      | 0                           | 0.85 |
| 25   | 0.92      | 0                           | 0.84 |
| 25   | 0.91      | 0                           | 0.62 |
| 25   | 0.87      | 0                           | 0.41 |
| 25   | 0.89      | 0                           | 0.58 |
| 25   | 0.89      | 0                           | 1.07 |
| 19   | 0.90      | 0                           | 0.19 |

| <b>SAMPLE ID</b> | <b>Depth (cm)</b> | <b>n-C12 OH (ug</b> | <b>n-C13 OH (ug</b> | <b>n-C15 ketone</b> | <b>n-C14 OH (ug</b> | <b>n-C15 OH (ug</b> |
|------------------|-------------------|---------------------|---------------------|---------------------|---------------------|---------------------|
| 2-C0-1 F2        | 1                 | 3.44                | 3.51                | 6.92                | 15.57               | 31.34               |
| 2-C0-2 F2        | 5                 | 1.29                | 2.04                | 1.32                | 7.39                | 10.06               |
| 2-C0-3 F2        | 10                | 1.10                | 1.41                | 2.37                | 4.63                | 6.72                |
| 2-C0-4 F2        | 15                | 1.17                | 3.17                | 4.83                | 14.83               | 20.15               |
| 2-C0-5 F2        | 20                | 1.24                | 2.48                | 5.44                | 8.26                | 9.55                |
| 2C-C1-2 F2       | 38                | 1.03                | 3.88                | 2.04                | 19.53               | 32.96               |
| 2C-C1-4 F2       | 42.75             | 7.04                | 5.60                | 6.04                | 19.02               | 24.94               |
| 2C-C1-7 F2       | 49.75             | 5.79                | 5.73                | 5.76                | 27.37               | 36.80               |
| 2C-C1-10 F2      | 59.25             | 4.85                | 6.69                | 8.16                | 37.97               | 55.99               |
| 2C-C1-11 F2      | 62                | 10.97               | 8.89                | 7.98                | 51.46               | 47.15               |
| 2C-C1-14 F2      | 69                | 3.75                | 4.37                | 6.11                | 38.35               | 47.32               |
| 2C-C1-15 F2      | 71                | 10.65               | 7.94                | 8.43                | 72.08               | 63.64               |
| 2C-C1-18 F2      | 78                | 2.92                | 9.87                | 7.27                | 83.07               | 113.25              |
| 2C-C1-21 F2      | 93.25             | 7.00                | 4.97                | 5.74                | 40.77               | 32.18               |
| 2C-C1-24 F2      | 102.5             | 1.79                | 3.67                | 3.69                | 39.30               | 45.37               |
| 2C-C1-25 F2      | 105.5             | 8.22                | 9.48                | 10.42               | 51.55               | 52.75               |
| 2C-C1-26 F2      | 108.25            | 10.27               | 9.27                | 14.77               | 74.90               | 65.01               |
| 2C-C1-28 F2      | 113.5             | 5.80                | 6.80                | 8.46                | 46.77               | 58.12               |
| 2C-C2-1 F2       | 121               | 5.57                | 6.49                | 6.39                | 59.70               | 66.37               |
| 2C-C2-3 F2       | 126               | 5.81                | 5.96                | 7.66                | 39.68               | 49.05               |
| 2C-C2-5 F2       | 130               | 6.21                | 7.15                | 9.17                | 58.38               | 69.69               |
| 2C-C2-7 F2       | 134.25            | 2.96                | 6.79                | 5.70                | 38.03               | 60.36               |
| 2C-C2-9 F2       | 139.25            | 3.40                | 7.69                | 6.36                | 44.94               | 58.37               |

| n-C17 ketone | n-C16 OH (ug g <sup>-1</sup> ) | n-C18 ketone | n-C17 OH (ug g <sup>-1</sup> ) | Phytol (ug g <sup>-1</sup> ) | n-C19 ketone | n-C18 OH (ug g <sup>-1</sup> ) |
|--------------|--------------------------------|--------------|--------------------------------|------------------------------|--------------|--------------------------------|
| 0.00         | 102.79                         | 18.33        | 84.21                          | 0.00                         | 0.00         | 241.45                         |
| 1.66         | 35.08                          | 2.88         | 17.02                          | 0.00                         | 0.00         | 77.30                          |
| 1.51         | 22.62                          | 4.08         | 11.39                          | 0.00                         | 0.00         | 51.32                          |
| 4.37         | 63.85                          | 7.46         | 30.71                          | 0.00                         | 0.00         | 107.67                         |
| 2.71         | 34.52                          | 4.99         | 14.08                          | 0.00                         | 3.70         | 70.85                          |
| 3.39         | 77.07                          | 10.46        | 51.96                          | 3.95                         | 5.49         | 220.22                         |
| 9.75         | 64.42                          | 7.44         | 27.28                          | 8.41                         | 6.11         | 191.12                         |
| 11.97        | 96.48                          | 11.88        | 40.47                          | 13.59                        | 5.21         | 289.77                         |
| 15.65        | 130.40                         | 12.16        | 68.28                          | 0.00                         | 7.19         | 363.75                         |
| 5.30         | 171.65                         | 13.78        | 56.70                          | 28.83                        | 17.18        | 651.37                         |
| 2.89         | 121.84                         | 18.74        | 54.49                          | 22.34                        | 6.73         | 387.08                         |
| 5.58         | 206.58                         | 25.68        | 79.09                          | 90.41                        | 7.20         | 687.99                         |
| 18.16        | 371.48                         | 34.00        | 215.37                         | 13.50                        | 13.36        | 1689.54                        |
| 3.36         | 105.81                         | 13.73        | 33.63                          | 16.79                        | 6.58         | 299.88                         |
| 13.87        | 153.28                         | 19.07        | 65.06                          | 99.88                        | 8.22         | 652.34                         |
| 18.05        | 174.65                         | 16.66        | 67.77                          | 115.73                       | 6.09         | 739.19                         |
| 6.60         | 204.84                         | 21.07        | 68.13                          | 96.01                        | 13.12        | 74.58                          |
| 4.38         | 160.88                         | 20.86        | 78.50                          | 78.29                        | 8.83         | 665.01                         |
| 6.28         | 198.21                         | 25.18        | 95.16                          | 216.43                       | 13.96        | 703.00                         |
| 5.80         | 153.37                         | 31.00        | 87.04                          | 47.40                        | 4.26         | 741.69                         |
| 6.16         | 201.69                         | 31.61        | 88.23                          | 71.42                        | 12.07        | 738.18                         |
| 4.56         | 150.20                         | 17.67        | 89.49                          | 7.06                         | 5.72         | 545.45                         |
| 9.65         | 149.07                         | 13.52        | 79.74                          | 4.68                         | 16.49        | 541.43                         |



| n-C20 ketone | n-C21 ketone | n-C20 OH (ug | n-C22 ketone | n-C21 OH (ug | n-C23 ketone | n-C22 OH (ug |
|--------------|--------------|--------------|--------------|--------------|--------------|--------------|
| 3.04         | 1.84         | 48.97        | 23.04        | 5.84         | 12.05        | 97.03        |
| 2.88         | 6.02         | 45.57        | 4.38         | 5.70         | 11.29        | 96.20        |
| 2.29         | 4.76         | 37.96        | 3.27         | 8.24         | 8.07         | 97.96        |
| 4.41         | 7.24         | 46.73        | 9.17         | 6.08         | 12.99        | 91.36        |
| 2.48         | 5.14         | 52.99        | 3.47         | 8.36         | 5.49         | 153.86       |
| 9.55         | 12.79        | 41.77        | 10.12        | 17.83        | 34.36        | 424.19       |
| 4.54         | 8.44         | 44.02        | 8.97         | 17.33        | 20.81        | 340.80       |
| 6.17         | 10.25        | 44.32        | 12.84        | 13.93        | 21.86        | 344.26       |
| 6.18         | 17.40        | 47.16        | 26.11        | 16.52        | 31.43        | 184.68       |
| 5.50         | 3.97         | 150.52       | 21.30        | 40.39        | 31.47        | 602.93       |
| 8.08         | 16.18        | 60.87        | 12.82        | 18.50        | 23.83        | 237.41       |
| 8.50         | 16.45        | 112.29       | 20.71        | 28.87        | 29.39        | 325.59       |
| 19.33        | 22.09        | 246.43       | 83.36        | 72.52        | 57.50        | 524.52       |
| 4.16         | 4.61         | 48.50        | 12.11        | 11.34        | 10.61        | 117.47       |
| 5.39         | 3.85         | 132.66       | 24.74        | 31.80        | 25.77        | 304.98       |
| 31.21        | 9.67         | 148.24       | 22.98        | 38.37        | 36.25        | 367.68       |
| 5.20         | 6.28         | 103.61       | 23.39        | 28.09        | 26.72        | 341.21       |
| 6.81         | 10.28        | 102.24       | 22.27        | 30.32        | 27.47        | 345.50       |
| 6.48         | 18.24        | 97.77        | 42.86        | 30.83        | 40.74        | 17.49        |
| 7.96         | 11.12        | 95.03        | 49.58        | 36.06        | 27.05        | 426.50       |
| 10.75        | 14.79        | 74.97        | 44.56        | 22.04        | 37.59        | 344.96       |
| 7.07         | 14.55        | 79.13        | 24.00        | 29.74        | 23.14        | 238.44       |
| 8.84         | 12.18        | 106.45       | 14.57        | 38.37        | 47.83        | 470.02       |

| n-C23 OH (ug | n-C25 ketone | n-C24 OH (ug | n-C26 ketone | n-C25 OH (ug | n-C26 OH (ug | n-C27 OH (ug |
|--------------|--------------|--------------|--------------|--------------|--------------|--------------|
| 7.90         | 4.33         | 13.74        | 0.00         | 31.39        | 3.89         | 13.30        |
| 8.82         | 7.30         | 64.42        | 0.00         | 5.34         | 37.32        | 6.15         |
| 9.20         | 5.34         | 73.03        | 0.00         | 2.77         | 29.57        | 9.76         |
| 12.03        | 6.80         | 76.17        | 0.00         | 2.84         | 37.47        | 1.78         |
| 14.68        | 3.83         | 116.26       | 0.00         | 3.96         | 35.33        | 7.81         |
| 22.65        | 18.61        | 86.99        | 7.18         | 7.06         | 20.55        | 8.59         |
| 28.09        | 8.55         | 176.41       | 56.71        | 8.17         | 67.25        | 15.88        |
| 21.34        | 12.62        | 148.98       | 19.28        | 9.99         | 61.25        | 1.49         |
| 23.21        | 13.30        | 105.93       | 116.15       | 16.07        | 22.14        | 5.39         |
| 66.80        | 16.63        | 417.87       | 177.62       | 33.43        | 126.74       | 8.48         |
| 30.04        | 21.40        | 121.34       | 10.53        | 10.32        | 18.10        | 7.10         |
| 41.06        | 17.26        | 172.13       | 37.85        | 17.28        | 29.30        | 8.18         |
| 57.62        | 21.61        | 249.27       | 83.89        | 34.86        | 52.88        | 8.74         |
| 15.09        | 6.54         | 60.07        | 11.39        | 6.43         | 11.40        | 4.74         |
| 37.70        | 16.64        | 152.57       | 79.31        | 18.21        | 22.55        | 6.80         |
| 50.25        | 7.43         | 203.83       | 55.07        | 16.77        | 20.05        | 4.55         |
| 45.68        | 22.12        | 160.00       | 89.29        | 19.04        | 12.17        | 8.48         |
| 45.57        | 21.32        | 168.19       | 60.88        | 22.83        | 26.02        | 7.67         |
| 67.83        | 19.96        | 316.19       | 59.79        | 43.46        | 91.47        | 9.83         |
| 62.79        | 17.14        | 214.50       | 21.50        | 24.25        | 25.03        | 16.72        |
| 53.96        | 24.36        | 228.54       | 62.49        | 31.94        | 44.86        | 23.51        |
| 29.60        | 7.91         | 77.27        | 65.96        | 10.74        | 7.68         | 73.00        |
| 64.41        | 26.91        | 285.38       | 29.72        | 21.77        | 48.42        | 0.00         |

| n-C28 OH (ug | Cholesterol (u | Stigmasterol | Sitosterol (ug | Sitostanol (u | Hopanol (ug g | sum even C1 |
|--------------|----------------|--------------|----------------|---------------|---------------|-------------|
| 2.51         | 3.58           | 0.00         | 4.74           | 0.00          | 7.00          | 359.81      |
| 16.88        | 7.23           | 10.10        | 23.63          | 63.12         | 76.95         | 119.77      |
| 7.52         | 10.79          | 9.72         | 21.00          | 40.19         | 54.72         | 78.56       |
| 12.03        | 5.11           | 13.62        | 8.98           | 42.45         | 59.92         | 186.35      |
| 7.72         | 8.30           | 24.44        | 16.18          | 58.48         | 0.00          | 113.64      |
| 4.73         | 8.20           | 23.53        | 0.00           | 13.82         | 127.16        | 316.82      |
| 10.87        | 39.11          | 32.88        | 0.00           | 0.00          | 77.32         | 274.56      |
| 9.89         | 38.37          | 19.28        | 0.00           | 0.00          | 43.68         | 413.61      |
| 5.48         | 11.24          | 0.00         | 1.95           | 0.00          | 12.43         | 532.11      |
| 37.09        | 136.92         | 10.01        | 0.00           | 0.00          | 23.28         | 874.47      |
| 15.25        | 28.70          | 0.00         | 7.66           | 0.00          | 27.60         | 547.28      |
| 13.79        | 47.66          | 0.00         | 11.09          | 0.00          | 30.45         | 966.66      |
| 22.23        | 82.70          | 0.00         | 19.76          | 0.00          | 19.49         | 2144.09     |
| 6.49         | 22.46          | 0.00         | 2.06           | 10.88         | 9.31          | 446.45      |
| 17.38        | 41.66          | 2.17         | 6.03           | 5.72          | 4.10          | 844.91      |
| 10.51        | 49.33          | 6.73         | 26.61          | 13.75         | 6.42          | 965.39      |
| 17.34        | 22.22          | 0.00         | 0.00           | 19.33         | 5.83          | 354.33      |
| 24.61        | 46.49          | 0.00         | 7.07           | 14.42         | 7.84          | 872.65      |
| 57.12        | 34.71          | 0.00         | 6.11           | 11.09         | 10.55         | 960.91      |
| 11.15        | 22.76          | 0.00         | 7.02           | 11.11         | 8.93          | 934.74      |
| 17.21        | 29.02          | 0.00         | 5.09           | 18.84         | 16.48         | 998.25      |
| 8.19         | 6.82           | 0.00         | 7.63           | 0.00          | 38.40         | 733.67      |
| 28.07        | 53.01          | 0.00         | 13.43          | 0.00          | 15.82         | 735.45      |

| sum even C2 | sum even C2 | CPI 22-28 | Cholesterol:f | ACL C22-28 | Cmax | C26-28/C22-28 |
|-------------|-------------|-----------|---------------|------------|------|---------------|
| 159.75      | 6.40        | 1.28      | 0.76          | 23.34      | 18   | 0.06          |
| 206.18      | 54.20       | 7.80      | 0.07          | 23.85      | 22   | 0.34          |
| 208.95      | 37.09       | 7.15      | 0.15          | 23.64      | 22   | 0.22          |
| 214.27      | 49.50       | 9.93      | 0.08          | 23.73      | 18   | 0.30          |
| 323.12      | 43.05       | 8.79      | 0.08          | 23.43      | 22   | 0.16          |
| 552.95      | 25.28       | 8.41      | 0.22          | 22.65      | 22   | 0.05          |
| 561.24      | 78.12       | 8.05      | 1.19          | 23.26      | 22   | 0.15          |
| 537.56      | 71.14       | 11.80     | 1.99          | 23.11      | 22   | 0.14          |
| 337.77      | 27.62       | 4.99      | 5.76          | 23.19      | 18   | 0.10          |
| 1171.33     | 163.83      | 7.95      | 13.68         | 23.37      | 18   | 0.16          |
| 419.62      | 33.35       | 5.60      | 3.75          | 23.14      | 18   | 0.09          |
| 610.01      | 43.09       | 5.58      | 4.30          | 23.12      | 18   | 0.09          |
| 1020.22     | 75.10       | 5.69      | 4.19          | 23.10      | 18   | 0.10          |
| 226.03      | 17.89       | 5.08      | 1.74          | 23.19      | 18   | 0.10          |
| 590.21      | 39.93       | 5.36      | 2.99          | 23.12      | 18   | 0.09          |
| 719.75      | 30.56       | 5.77      | 1.05          | 23.00      | 18   | 0.05          |
| 604.83      | 29.51       | 4.80      | 1.15          | 23.02      | 22   | 0.06          |
| 615.93      | 50.63       | 4.99      | 2.16          | 23.16      | 18   | 0.10          |
| 431.45      | 148.59      | 3.67      | 2.02          | 24.63      | 18   | 0.45          |
| 736.03      | 36.17       | 4.42      | 1.26          | 23.04      | 18   | 0.06          |
| 648.47      | 62.07       | 4.15      | 1.21          | 23.35      | 18   | 0.11          |
| 394.83      | 15.87       | 1.84      | 0.89          | 23.49      | 18   | 0.05          |
| 861.85      | 76.50       | 6.76      | 3.95          | 23.16      | 18   | 0.10          |

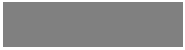

Naafs et al. 2017 Jonge et al. 2014

| Sample ID | Depth (cm) | BIT  | pHpeat | pH  |
|-----------|------------|------|--------|-----|
| 2-C0-1    | 1          | 1.00 | 6.9    | 6.7 |
| 2-C0-2    | 5          | 1.00 | 6.9    | 6.9 |
| 2-C0-3    | 10         | 1.00 | 6.9    | 6.9 |
| 2-C0-4    | 15         | 1.00 | 6.9    | 6.8 |
| 2-C0-5    | 20         | 1.00 | 6.9    | 6.9 |
| 2C-C1-2   | 38         | 1.00 | 7.1    | 7.1 |
| 2C-C1-4   | 42.75      | 1.00 | 7.1    | 7.1 |
| 2C-C1-7   | 49.75      | 1.00 | 6.9    | 6.8 |
| 2C-C1-10  | 59.25      | 1.00 | 7.0    | 7.0 |
| 2C-C1-11  | 62         | 1.00 | 6.9    | 6.8 |
| 2C-C1-14  | 69         | 1.00 | 6.9    | 6.9 |
| 2C-C1-18  | 78         | 1.00 | 7.0    | 6.6 |
| 2C-C1-21  | 93.25      | 1.00 | 6.9    | 6.8 |
| 2C-C1-24  | 102.5      | 1.00 | 7.0    | 6.7 |
| 2C-C1-25  | 105.5      | 1.00 | 7.2    | 6.8 |
| 2C-C1-26  | 108.25     | 1.00 | 7.1    | 6.8 |
| 2C-C1-28  | 113.5      | 1.00 | 7.1    | 6.7 |
| 2C-C2-1   | 121        | 1.00 | 6.9    | 6.5 |
| 2C-C2-3   | 126        | 1.00 | 7.1    | 6.7 |
| 2C-C2-5   | 130        | 1.00 | 7.0    | 6.7 |
| 2C-C2-7   | 134.25     | 1.00 | 6.9    | 6.6 |
| 2C-C2-9   | 139.25     | 1.00 | 6.9    | 6.6 |

| Uncorr. T-model (calibr to MAAT >0C) |                           | Uncorr. T0-model (not synthesized at T<0C) |                           |
|--------------------------------------|---------------------------|--------------------------------------------|---------------------------|
| Naafs et al. 2017                    | Crampton-Flood et al 2020 | DeJonge et al. 2014                        | Crampton-Flood et al 2020 |
| MAATpeat °C                          | ayMBT MAAT °C             | MAAT °C                                    | ayMBT MAAT °C             |
| -5.3                                 | -5.0                      | 2.1                                        | 3.7                       |
| -6.4                                 | -6.1                      | 1.5                                        | 3.6                       |
| -5.9                                 | -5.5                      | 1.8                                        | 3.8                       |
| -5.8                                 | -5.6                      | 1.8                                        | 4.0                       |
| -6.9                                 | -6.9                      | 1.2                                        | 3.4                       |
| -9.5                                 | -8.7                      | -0.4                                       | 2.6                       |
| -10.2                                | -9.4                      | -0.8                                       | 2.5                       |
| -3.3                                 | -3.6                      | 3.3                                        | 4.4                       |
| -10.6                                | -10.4                     | -1.1                                       | 2.3                       |
| -7.5                                 | -7.2                      | 0.8                                        | 3.2                       |
| -5.9                                 | -6.0                      | 1.8                                        | 3.7                       |
| -0.4                                 | -0.8                      | 5.1                                        | 6.4                       |
| -3.7                                 | -4.0                      | 3.1                                        | 4.5                       |
| 0.5                                  | -0.6                      | 5.6                                        | 6.7                       |
| -0.5                                 | -2.0                      | 5.0                                        | 5.4                       |
| 1.1                                  | -0.3                      | 6.0                                        | 6.5                       |
| 1.8                                  | 0.4                       | 6.4                                        | 7.1                       |
| -0.3                                 | -1.1                      | 5.1                                        | 6.1                       |
| 0.5                                  | -0.9                      | 5.6                                        | 6.3                       |
| 0.3                                  | -0.4                      | 5.5                                        | 6.6                       |
| 0.7                                  | 0.2                       | 5.7                                        | 6.3                       |
| 0.1                                  | -0.4                      | 5.4                                        | 6.4                       |
