# Supplementary material for: Preservation and degradation of ancient organic matter in mid-Miocene Antarctic permafrost
Source: Copernicus journal article supplement (doi:10.5194/bg-22-5771-2025), 2025-10-21
Supplement: Supplementary file [file bg-22-5771-2025-supplement-title-page.pdf › bg-22-5771-2025-supplement-title-page.pdf]

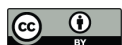

*Supplement of*

## **Preservation and degradation of ancient organic matter in mid-Miocene Antarctic permafrost**

**Marjolaine Verret et al.**

*Correspondence to:* Marjolaine Verret ([marjolainv@unis.no](mailto:marjolainv@unis.no))

- [bg-22-5771-2025-supplement-title-page.pdf](#)
- [Supplementary Figures.pdf](#)
- [Supplementary\\_Data.pdf](#)

The copyright of individual parts of the supplement might differ from the article licence.
